# Supplementary material for: Dissecting the biological relationship between TCGA miRNA and mRNA sequencing data using MMiRNA-Viewer
Source: Springer Nature journal article supplement (doi:10.1186/s12859-016-1219-y), 2016-10-01

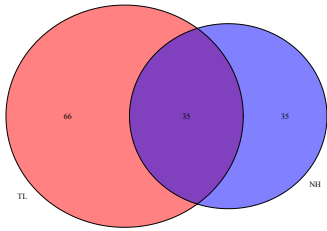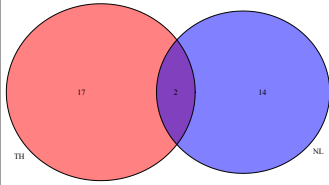

KICH\_shared\_GO\_in\_NH\_TL

KICH\_shared\_GO\_in\_NL\_TH

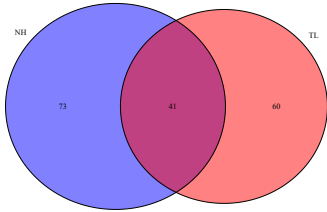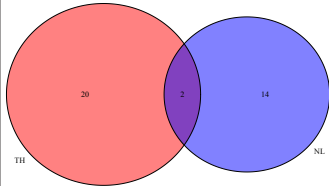

KIRP\_shared\_GO\_in\_NH\_TL

KIRP\_shared\_GO\_in\_NL\_TH

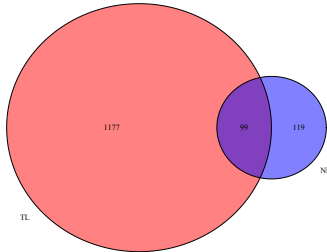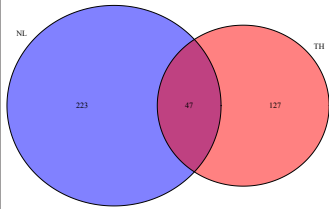

LIHC\_shared\_GO\_in\_NH\_TL

LIHC\_shared\_GO\_in\_NL\_TH

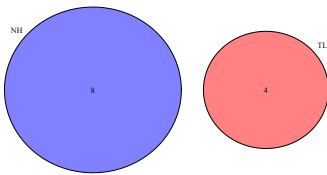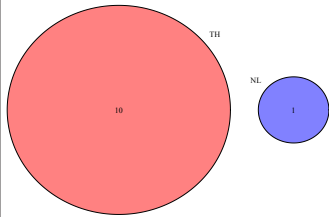

THCA\_shared\_GO\_in\_NH\_TL

THCA\_shared\_GO\_in\_NL\_TH

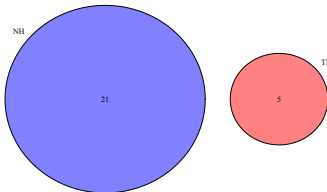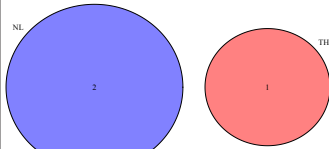

Supplement: 12859_2016_1219_MOESM7_ESM.pdf [file 12859_2016_1219_MOESM7_ESM.pdf]
